# Supplementary material for: Systemic factors for enhancing intersectoral collaboration for the operationalization of One Health: a case study in India
Source: PubMed Central journal article supplement (PMC8097865; doi:10.1186/s12961-021-00727-9), 2021-05-04
Supplement: 12961_2021_727_MOESM1_ESM.pdf [file 12961_2021_727_MOESM1_ESM.pdf]

## **Additional file 1. (RICOHA form 5.1: Interview guide for Vignette study)**

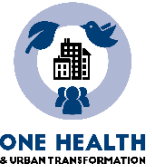

### **Topic: General and personal information**

1. Introduction of the research and agreement for the interview.
2. What is your experience in the prevention & control of zoonotic diseases?

### **Topic: Convergence pattern**

*[Brief about the importance of One Health Collaboration]*

3. In your opinion, when the actors from the human and the animal health system should collaborate for effectual prevention and control of zoonoses?
4. If we consider the three-tier health system of India, in your opinion, where the convergence of actors from the human and the animal health system need to be focused? [Prompt: Entry points for collaboration]
5. In your view, how could the collaboration between the human and the animal health system be strengthened? [Prompt: Strategies for collaboration (early detection, combined health services), Ways to engage private actors]
6. In your opinion, what should be the ideal reporting pattern for the early detection of zoonotic diseases among key actors of the human & animal health system?
7. In your opinion, what should be the ideal roles & responsibilities of the following actors with reference to the collaboration?
  - a. Actors at the community level
  - b. Actors at the clinical level
  - c. Actors at the managerial level
8. What needs to be done further to strengthen the collaboration between various actors?

*[Prompt: Consider for disease-specific i.e., Rabies, Brucellosis, Influenza (H1N1, H5N1) and at different levels of health system]*

***Any further suggestions!***
