# Supplementary material for: Systemic factors for enhancing intersectoral collaboration for the operationalization of One Health: a case study in India
Source: PubMed Central journal article supplement (PMC8097865; doi:10.1186/s12961-021-00727-9), 2021-05-04
Supplement: 12961_2021_727_MOESM2_ESM.pdf [file 12961_2021_727_MOESM2_ESM.pdf]

**Additional file 2. (RIOCHA Form-5.2: Policy Delphi tool for validation of key strategies)**

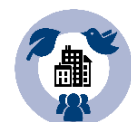

**ONE HEALTH**  
& URBAN TRANSFORMATION

*[Online survey through Survey monkey]*

| <b>Section-1: Basic information</b>         |  |                    |  |
|---------------------------------------------|--|--------------------|--|
| <b>UID</b>                                  |  |                    |  |
| <b>Name</b>                                 |  |                    |  |
| <b>Department</b>                           |  | <b>Designation</b> |  |
| <b>Mobile</b>                               |  | <b>GPS</b>         |  |
| <b>Completed age (in years)</b>             |  |                    |  |
| <b>Gender</b>                               |  |                    |  |
| <b>Highest educational qualification</b>    |  |                    |  |
| <b>Total years of experience (in years)</b> |  |                    |  |

| <b>Section-2: Key strategies on effectual prevention and control of zoonotic diseases in Ahmedabad, India</b>                                     |                            |                             |                           |                            |
|---------------------------------------------------------------------------------------------------------------------------------------------------|----------------------------|-----------------------------|---------------------------|----------------------------|
| <b>Strategies</b>                                                                                                                                 | <b>Somewhat preferable</b> | <b>Very much preferable</b> | <b>Somewhat essential</b> | <b>Very much essential</b> |
| <b>Legal strategies or policies</b>                                                                                                               |                            |                             |                           |                            |
| Public health act or clinical establishment act for all the clinics in the state emphasizing reporting any conditions to the public health system | ①                          | ②                           | ③                         | ④                          |
| Guidelines for disposal of all dead animals irrespective of the disease condition                                                                 | ①                          | ②                           | ③                         | ④                          |
| Development of joint guidelines (clinical/preventive) for each prioritized zoonotic diseases                                                      | ①                          | ②                           | ③                         | ④                          |
| Urban city should have animal treatment centers, hostel facility where stray animals can be inspected and vaccinated is recommended               | ①                          | ②                           | ③                         | ④                          |
| Bi-directional and cross-flow of information is recommended with respective departments                                                           | ①                          | ②                           | ③                         | ④                          |

|                                                                                                                                                                 |   |   |   |   |
|-----------------------------------------------------------------------------------------------------------------------------------------------------------------|---|---|---|---|
| Zoonoses committee at district and state should act as the prime platform for One Health and similar zoonoses committee is encouraged at the urban setting too. | ① | ② | ③ | ④ |
| Provision of Animal Health Card/Passport for animals and compelling to use while buying/selling any animals                                                     | ① | ② | ③ | ④ |
| <b>Clinical aspects or disease-specific</b>                                                                                                                     |   |   |   |   |
| Strengthening the capacity of laboratories for screening and diagnosing zoonotic conditions                                                                     | ① | ② | ③ | ④ |
| Prophylactic vaccination of animals for rabies prevention                                                                                                       | ① | ② | ③ | ④ |
| Capacity development for differential diagnosis of brucellosis as an ultimate prevention strategy                                                               | ① | ② | ③ | ④ |
| Promoting good hygiene for flu prevention                                                                                                                       | ① | ② | ③ | ④ |
| <b>Collaboration at the managerial level</b>                                                                                                                    |   |   |   |   |
| Resource sharing (especially Human resources) within each department to initiate the One Health approach                                                        | ① | ② | ③ | ④ |
| Regular data sharing and joint-data analysis                                                                                                                    | ① | ② | ③ | ④ |
| Information flowing from various departments to a single platform for early prediction of emerging diseases                                                     | ① | ② | ③ | ④ |
| Regular joint meetings among the program planners, even though there is no epidemic or out-break                                                                | ① | ② | ③ | ④ |
| Reporting pattern for prioritized zoonotic conditions to be established and regular monitoring of the same is essential                                         | ① | ② | ③ | ④ |
| Professional bodies like IMA, GVC should initiate collaborative activities                                                                                      | ① | ② | ③ | ④ |
| <b>Collaboration at the provider level</b>                                                                                                                      |   |   |   |   |
| Sharing of knowledge among Medical doctor and Veterinarians through a common platform                                                                           | ① | ② | ③ | ④ |
| A common One Health clinical body that is answerable for every queries related to zoonoses and assist in the clinical practice.                                 | ① | ② | ③ | ④ |
| The IEC materials should be with Medical doctors as well as Veterinarians to educate their patients                                                             | ① | ② | ③ | ④ |
| Social media like WhatsApp group of different clinical groups should be merged together for early alert system                                                  | ① | ② | ③ | ④ |
| There is a need to improve the early alert system about zoonoses much prior to the outbreak across the professionals                                            | ① | ② | ③ | ④ |

|                                                                                                                                                                         |   |   |   |   |
|-------------------------------------------------------------------------------------------------------------------------------------------------------------------------|---|---|---|---|
| Joint training on Zoonoses for medical doctors and veterinarians                                                                                                        | ① | ② | ③ | ④ |
| A detailed history taking for provisionally diagnosis of zoonotic conditions at primary care setting                                                                    | ① | ② | ③ | ④ |
| There should be a system of cross-referral of cases between medical doctor and veterinarian for respective risk assessment                                              | ① | ② | ③ | ④ |
| Symptom based early diagnosis capacity need to be developed among medical doctors and veterinarians                                                                     | ① | ② | ③ | ④ |
| <b>Collaboration at the community level</b>                                                                                                                             |   |   |   |   |
| One Health committee at the grass root level could be formulated with the help of the frontline workers along with the community representative                         | ① | ② | ③ | ④ |
| The frontline workers should communicate each other at the grass root level and also should inform both officials for any abnormal occurrence                           | ① | ② | ③ | ④ |
| Sensitization of community along with knowledge and awareness on prevention and control of zoonoses                                                                     | ① | ② | ③ | ④ |
| Financial incentives to the animal handlers to report any disease or any abnormal condition of their animals to the system                                              | ① | ② | ③ | ④ |
| Community awareness by the grass root healthcare workers                                                                                                                | ① | ② | ③ | ④ |
| <b>Inclusion of private actors</b>                                                                                                                                      |   |   |   |   |
| Financial incentive package to private providers for reporting a zoonosis to the public health system                                                                   | ① | ② | ③ | ④ |
| There should be no financial incentive for the private actors to report any zoonotic diseases, it should be by law                                                      | ① | ② | ③ | ④ |
| Dairy personnel could be trained further to improve the scope of symptom based disease detection among the animals                                                      | ① | ② | ③ | ④ |
| Sensitization and promotion of ethical practices among private providers as essential to bring them to the health system                                                | ① | ② | ③ | ④ |
| Social media of private actors should be integrated with the public health actors, to be a potential platform to exchange the knowledge and early detection of zoonoses | ① | ② | ③ | ④ |
