# Supplementary material for: Systemic factors for enhancing intersectoral collaboration for the operationalization of One Health: a case study in India
Source: PubMed Central journal article supplement (PMC8097865; doi:10.1186/s12961-021-00727-9), 2021-05-04
Supplement: 12961_2021_727_MOESM3_ESM.pdf [file 12961_2021_727_MOESM3_ESM.pdf]

### Additional file 3. (RICOHA form 5.3: Semi-structured tool for the participatory system workshop)

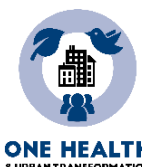

#### Step-1: System description

Here, a system is defined as the health system of Ahmedabad city, which comprises both the human and animal health sub-systems. This also comprises of the public and the private actors from both the system.

#### Step-2: Defining variables

*Please suggest further factors that you think would be considered while developing One Health inter-sectoral collaboration*

#### Step-3: Criteria assignments (Criteria Matrix)

To verify their completeness (from a “systems” viewpoint), all indicators were cross-checked against the fixed criteria. These criteria define the indicators’ representativeness, physical quality, dynamics, and entropy. The possible fitting scores are:

- Fully applicable (dark ● circle; 1)
- Partially applicable (open ○ circle; 0.5)
- No relevance (empty; 0)

The values for each domain are summed up and compared amongst one another, seeking a balanced coverage of all systemic aspects.

| Criteria                 | Description                                                                                                                        |
|--------------------------|------------------------------------------------------------------------------------------------------------------------------------|
| <b>Spheres of Life</b>   |                                                                                                                                    |
| Economy                  | Activities (What they do?) Capital production, tax receipts, debts, shareholder value                                              |
| Population               | Participants (Who are they all?) Number, structure and dynamics, working people, age structure                                     |
| Space utilization        | Space (What happens where?) Use of space, land development, residential structure                                                  |
| Human ecology            | Mood (How do people feel?) Human ecology, social structure, quality of life, security, education, state of health                  |
| Natural balance          | Natural balance (How does resources budget work?) Consumption of raw materials, energy, water, soil sealing, influence on climate  |
| Infrastructure           | Internal processes (What channels of communication are there?) Transport and access roads, tele communications, traffic and supply |
| Rules & Laws             | Internal order (How is this regulated?) Local government, taxes, measures, ordinances and legislations, planning procedure         |
| <b>Physical Category</b> |                                                                                                                                    |
| Matter                   | Factors having a primarily material character (E.g. Buildings, raw materials, people, animals, plants, vehicles)                   |
| Energy                   | Factors having a primarily energy-related character (E.g. Power consumption, Workers, Energy carriers, financial strengths)        |

|                                  |                                                                                                                                                                                             |
|----------------------------------|---------------------------------------------------------------------------------------------------------------------------------------------------------------------------------------------|
| Information                      | Factors having a primarily information-related and communication-related character (E.g. Media, decisions, explication, exchange of information, orders, perception, acceptance)            |
| <b>Dynamic Category</b>          |                                                                                                                                                                                             |
| Flow quantity                    | Factors expressing primarily flows of matter, energy, or information within the system (E.g. Power consumption, traffic, commuters, instructions)                                           |
| Structure quantity               | Factors serving to determine structure rather than flow (E.g. Green spaces, population densities, traffic network, accessibility, hierarchy)                                                |
| Temporal dynamics                | Factors that at the same location change at a given time or that possess temporal dynamics (E.g. Seasonal activity, election meetings, climate factors, transport timetables, tax checking) |
| Spatial dynamics                 | Factors that at a given time differ from location to location (E.g. Traffic revenue, industrial effluent, nature-conservation area)                                                         |
| <b>System relationship</b>       |                                                                                                                                                                                             |
| Opens the system through inputs  | Factors that open the system through influences from outside (E.g. precipitation, dumping, imports, tourism)                                                                                |
| Opens the system through outputs | Factors that open the system through influences from the inside (E.g. Waste water, commuters leaving the city, exports)                                                                     |
| Can be influenced from inside    | Factors that can be controlled by decision-making processes coming from within the system under consideration. Among other things, these are a measure of the system's self-sufficiency     |
| Can be influenced from outside   | Factors that are subject to decision-making processes taking place outside the system under consideration. Among other things, these are a measure of the system's dependence               |

#### Step-4: Matrix of Consensus (Impact Matrix)

Strength of connections should be assigned values between 0 to 3.

- **3 (Disproportionally strong connection):** If A changes only a little, B changes a lot
- **2 (Medium strength, more or less proportional connections):** If A changes a lot in order to achieve a more or less equally big change in B
- **1 (Weak connections):** If a marked change in A brings about only a weak change in B
- **0 (No connections):** No effect at all, a very weak effect or an effect occurring only after a lengthy delay

|    | F1 | F2 | F3 | F4 | F5 |
|----|----|----|----|----|----|
| F1 |    |    |    |    |    |
| F2 |    |    |    |    |    |
| F3 |    |    |    |    |    |
| F4 |    |    |    |    |    |
| F5 |    |    |    |    |    |
